# Supplementary material
Source: PubMed Central journal article supplement (PMC3857941)
Supplement: supp_ddt392_ddt392supp.pdf [file supp_ddt392_ddt392supp.pdf]

**Figure S1.** Primer walking for *RHOXF1* and *RHOXF2* identifies transcription start sites. (A) RNA from commercially available normal human testis was converted to cDNA and amplified using the same 3' primer and variable 5' primers designed to amplify *RHOXF1*. The mRNA is depicted by a red arrow and the amplicons are depicted by black lines. The names of each amplicon represent the annealing location of the variable 5' primer and are numbered relative to the translation start site. Data are normalized to beta-actin expression and plotted relative to the longest fragment. (B) Same as in part A but for *RHOXF2*.

**Figure S2.** Basal expression of *RHOXF1* and *RHOXF2* in non-testicular cell lines. *RHOXF1* (top panel) and *RHOXF2* (bottom panel) mRNA expression in the various cell lines (derived from the data in Fig. 2) plotted based on their delta Ct values x 10,000. Error bars represent SEM of a triplicate experiment.

**Figure S3.** *RHOXF2* but not *RHOXF1* expression increases proportionally with increased 5-AzaC treatment in MCF-7 cells. MCF-7 cells were treated with the indicated concentrations of 5-AzaC followed by qPCR analysis for *RHOXF1* and *RHOXF2*. Data are normalized to  $\beta$ -actin expression and plotted relative to the untreated (0 $\mu$ M) sample. Data are plotted on a log-scale.

**Figure S4.** *RHOXF1* is demethylated in response to 5-Aza treatment. Gene features and CpG residue locations relative to the translation start site are indicated for *RHOXF1* as in Fig. 4a. 293 and MCF-7 cells were treated 5-AzaC or not treated (Control) and subjected to bisulfite sequencing. Clonal data are shown as either methylated (black dots) or unmethylated (white dots) according to whether they had a C or a T at the CpG site, respectively. The regions analyzed are color-coded with lines under the gene and boxes around the dot-plots. Each region was assessed for percent methylation (number of methylated cytosines divided by total residues) and plotted as a color-coded pie-chart where the light color represents unmethylated cytosines and the dark color represents methylated cytosines. Values under each pair of pies represents the p-value according to Fishers exact test.

**Figure S5.** *RHOXF2* is demethylated in response to 5-Aza treatment. Gene features and CpG residue locations relative to the translation start site are indicated for *RHOXF2* as in Fig. 4b. 293 and MCF-7 cells were treated 5-AzaC or not treated (Control) and subjected to bisulfite sequencing. Clonal data are shown as either methylated (black dots) or unmethylated (white dots) according to whether they had a C or a T at the CpG site, respectively. The regions analyzed are color-coded with lines under the gene and boxes around the dot-plots. Each region was assessed for percent methylation (number of methylated cytosines divided by total residues) and plotted as a color-coded pie-chart where the light color represents unmethylated cytosines and the dark color represents methylated cytosines. Values under each pair of pies represents the p-value according to Fishers exact test.

**Figure S6.** *RHOX* methylation is elevated in sperm from infertility patients. (A) The average percent methylation as determined by pyrosequencing of two regions for *RHOXF1* (A and B) and two regions for *RHOXF2* (C and D) as well as *MEST* is plotted for the normal sperm group (white bars) and the abnormal sperm group (black bars). See Fig. 1A and Fig. 4 for region locations. Numbers represent p-values from a Mann-Whitney test comparing the normal group and the abnormal group. (B) Data from part A was normalized to the normal group to determine fold-change in the abnormal group (indicated above the bars).

**Figure S7.** Abnormal sperm patients have significantly higher *RHOX* methylation than normal sperm patients. (A) The abnormal sperm group (having at least one semen abnormality) was further subdivided as falling within the normal range or outside of the normal range for each individual semen parameter as defined by the WHO. Percent methylation as measured by pyrosequencing was plotted using the Tukey method. The p-values are indicated and are the result of a Mann-Whitney test. See Table 2 for N. (B) Same as in part A but for *MEST*.

**Figure S8.** Patients have vast hypermethylation of *RHOXF1*. (A) Two men from the normal sperm group and two men from the abnormal sperm group were analyzed by bisulfite sequencing for the degree of methylation within the *RHOXF1* locus. The gene features are indicated at the top and the CpG residues are indicated to-scale as red, vertical lines relative to the translation start site. Data from sequencing bacterial clones are shown as either methylated (black dots) or unmethylated (white dots). The regions analyzed are color-coded with lines

under the gene and boxes around the dot-plots. The regions that were detected by pyrosequencing are demarcated with black lines and the name of the region. The results of the pyrosequencing assay are indicated as percent-methylation (number of C's over number of T's incorporated into the pyrosequencing run) under the CpG residues that were assayed. **(B)** Pyrograms of the residues examined in the *RHOXF1* gene are shown with their peak strength and percent-calls and determined by the pyrosequencing software.

**Figure S9.** Patients have vast hypermethylation of *RHOXF2*. **(A)** Two men from the normal sperm group and two men from the abnormal sperm group were analyzed by bisulfite sequencing for the degree of methylation within the *RHOXF2* locus. The gene features are indicated at the top and the CpG residues are indicated to-scale as red, vertical lines. Data from sequencing bacterial clones are shown as either methylated (black dots) or unmethylated (white dots). The regions analyzed are color-coded with lines under the gene and boxes around the dot-plots. The regions that were detected by pyrosequencing are demarcated with black lines and the name of the region. The results of the pyrosequencing assay are indicated as percent-methylation (number of C's over number of T's incorporated into the pyrosequencing run) under the CpG residues that were assayed. **(B)** Pyrograms of the residues examined in the *RHOXF2* gene are shown with their peak strength and percent-calls and determined by the pyrosequencing software.

**Figure S10.** *NKAP* and *ZBTB33* expression in various cell lines after 5-AzaC treatment. Eight cell lines treated with 10 $\mu$ M 5-AzaC were analyzed for expression of *NKAP* (top panel) and *ZBTB33* (bottom panel) mRNA expression. Data were normalized to  $\beta$ -actin and plotted relative to the control-treatment. Error bars represent SEM of a triplicate experiment. Asterisk represents a p-value (students t-test between control and 5-AzaC treatment) <.05.

**Figure S11.** Genes neighboring the *RHOX* locus remain normo-methylated in infertile patients. The *NKAP* and *ZBTB33* genes are depicted at the top with the CpG residues represented by vertical red lines. The region analyzed by bisulfite sequencing is demarcated as horizontal black lines. Two patients from the normal group and two patients from the abnormal group were examined by bisulfite sequencing for the methylation status of *NKAP* and *ZBTB33*. The results of individual bacterial clones are shown as methylated (black dots), unmethylated (white dots) or undetermined (x) CpG residues.

**Figure S12.** Most infertile patients have hypermethylation along the entire *RHOX* cluster. **(A)** Overlap analysis was performed by categorizing patients as hypermethylated if their methylation scored higher than 95<sup>th</sup> percentile relative to the normal group. The number of patients exhibiting hypermethylation in each *RHOX* region is shown. Patients with hypermethylation at more than one region of the *RHOX* cluster are shown in the overlapping regions. **(B)** Regression analysis was performed by plotting the percent methylation, as determined by pyrosequencing, of the regions shown in all 140 patients.



FIGURE S1

A

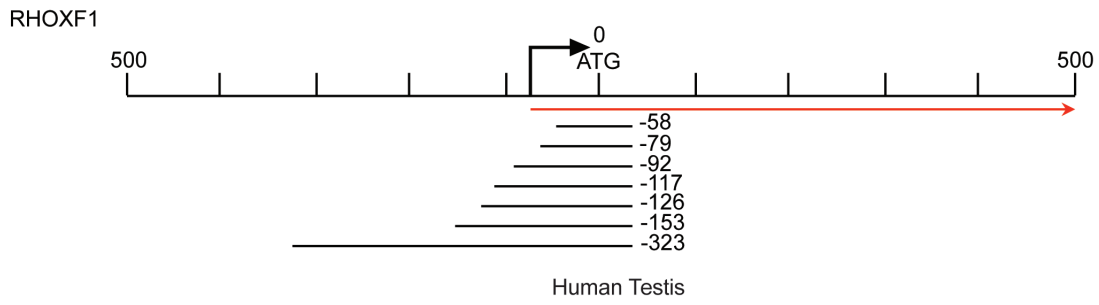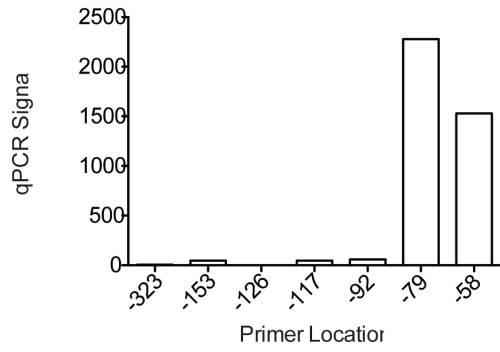

B

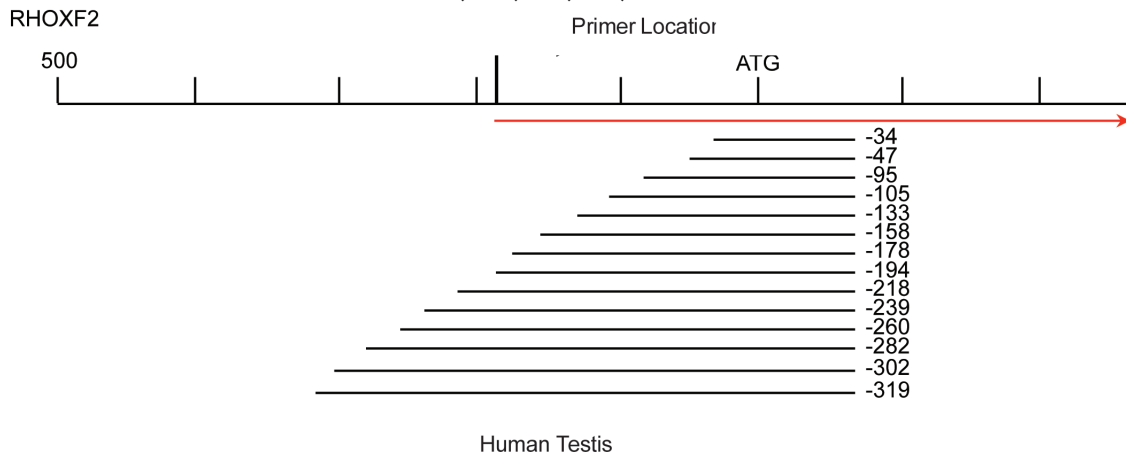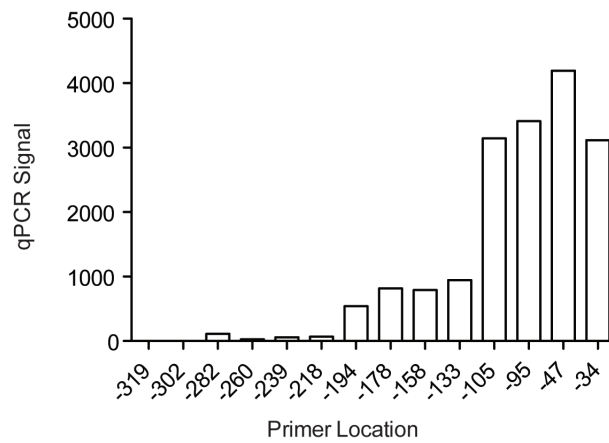

Figure S2

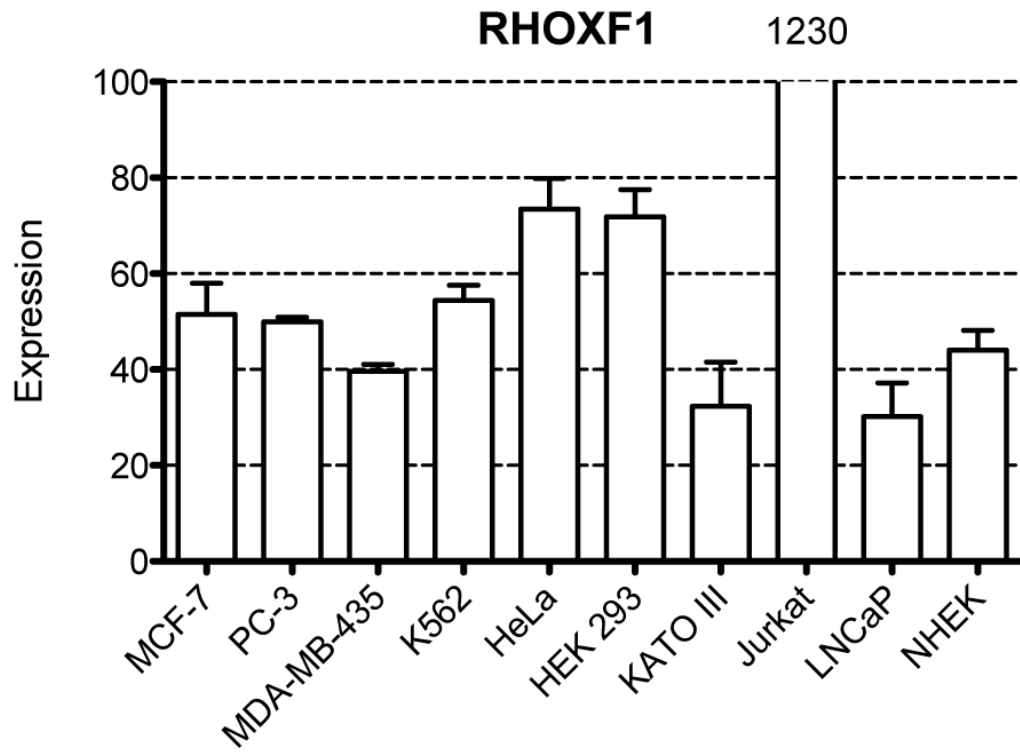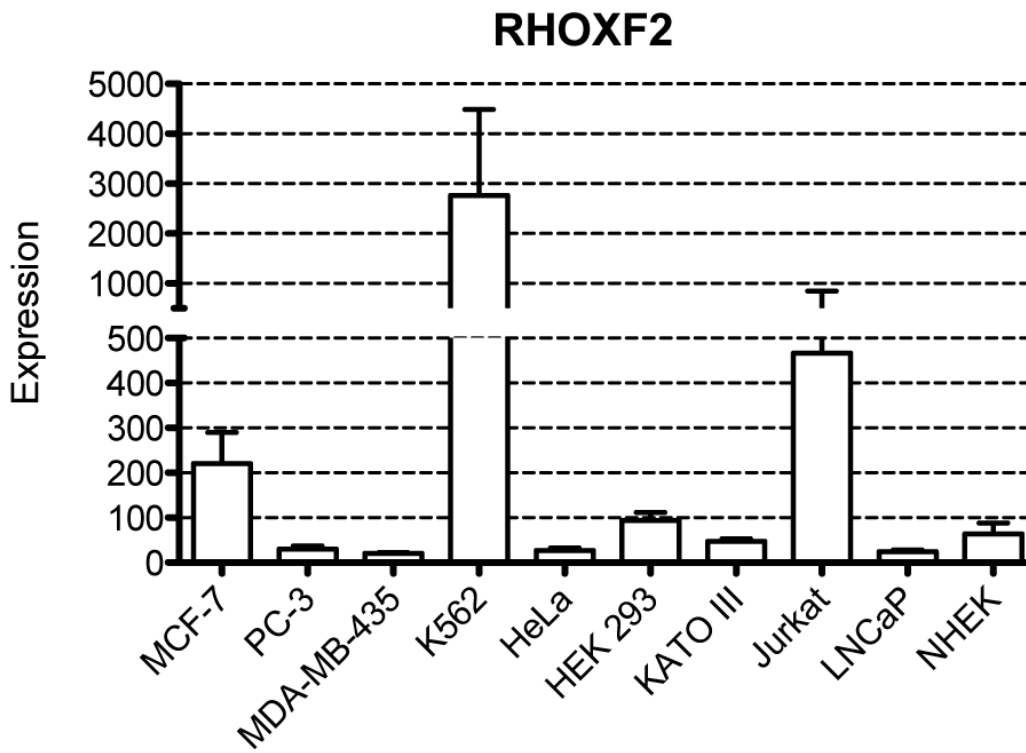

FIGURE S3

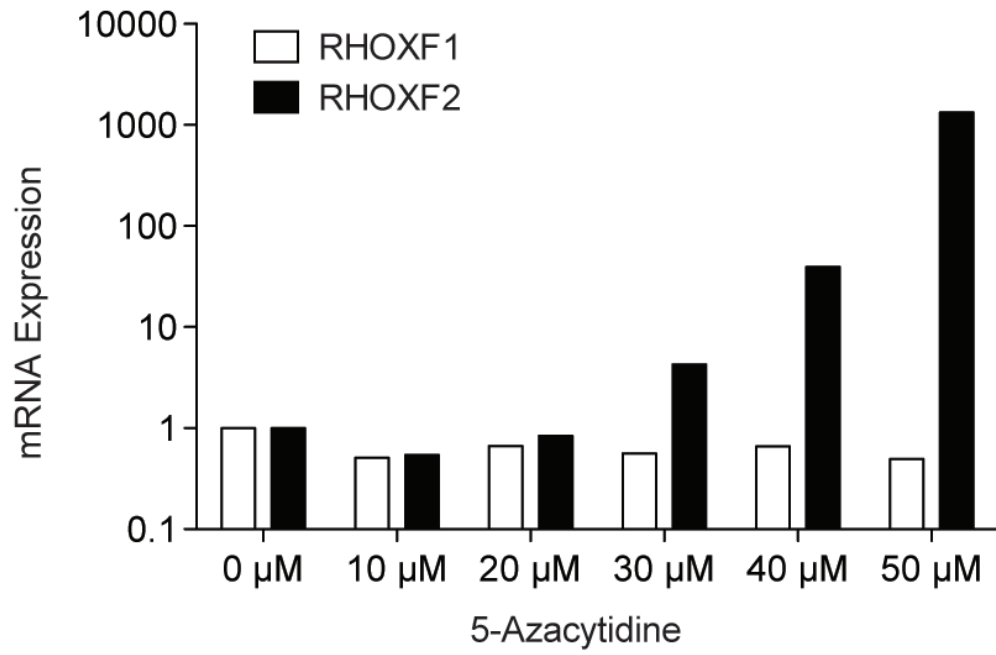

FIGURE S4

RHOXF1

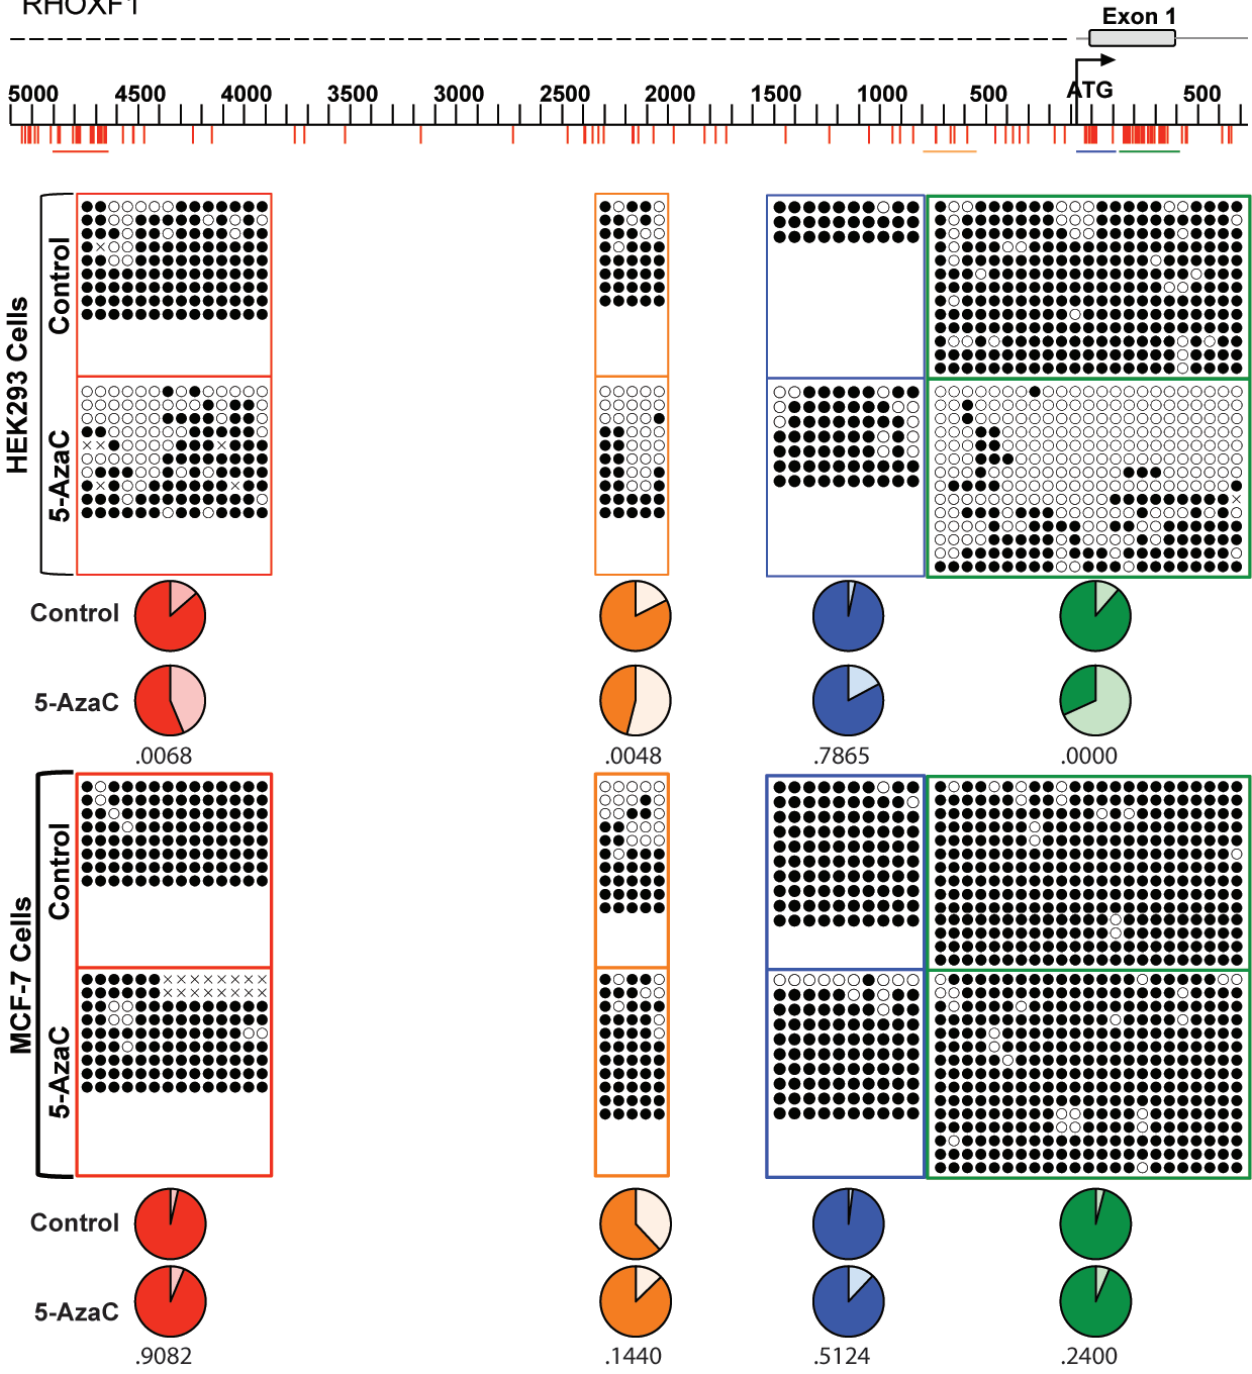

FIGURE S5

RHOXF2

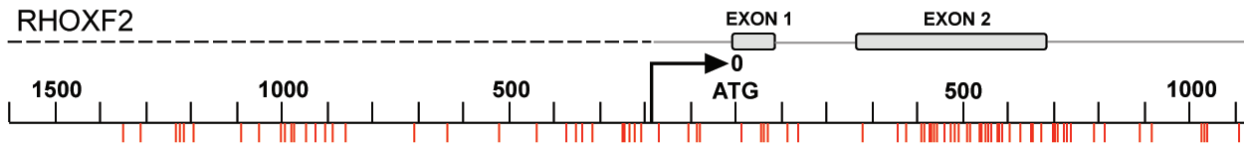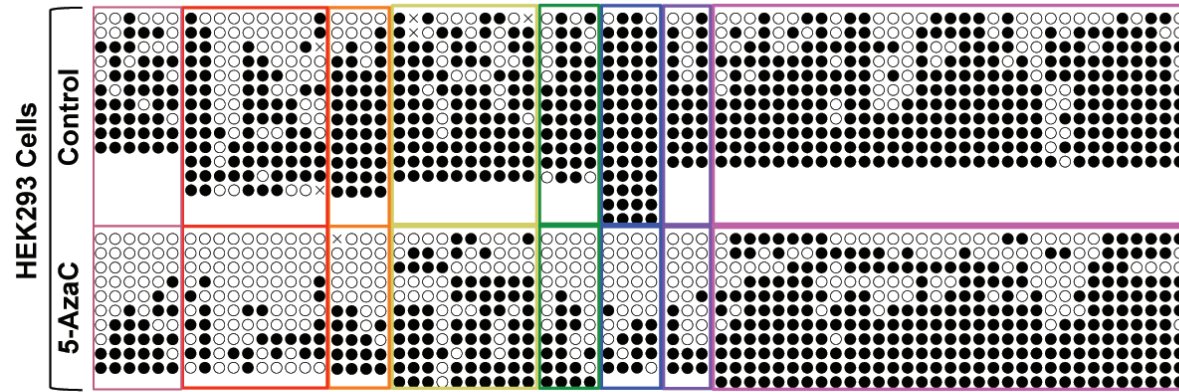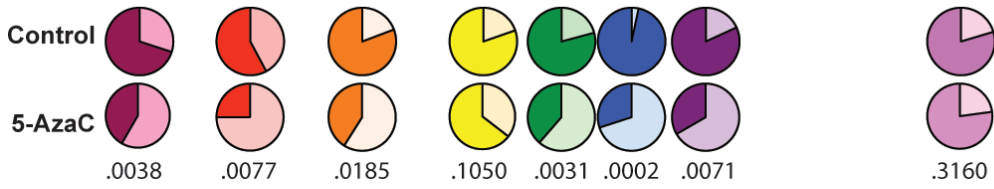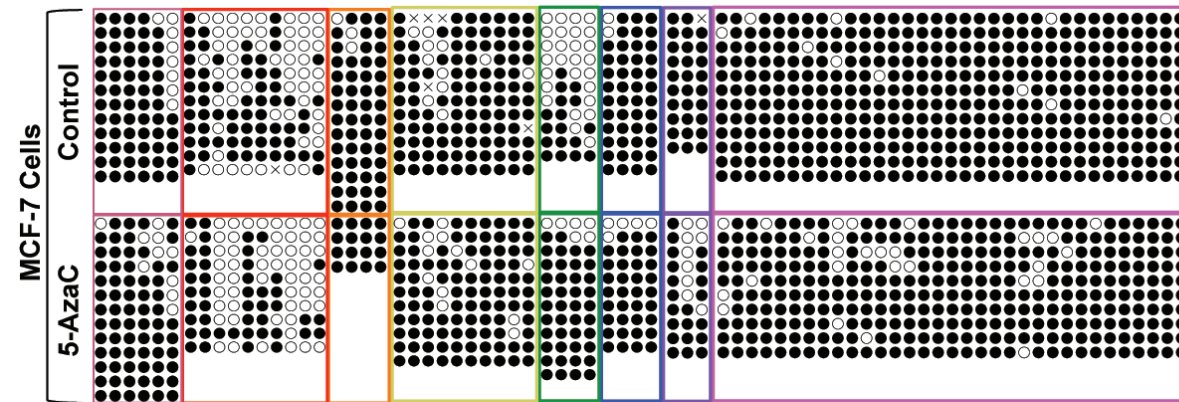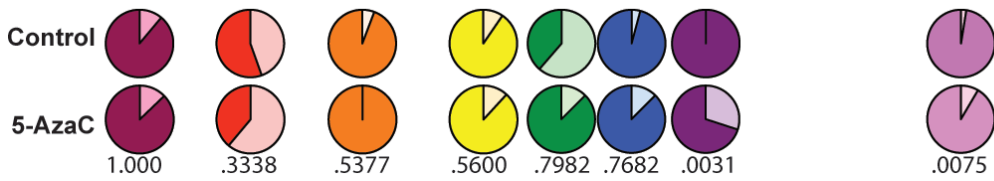



FIGURE S6

A

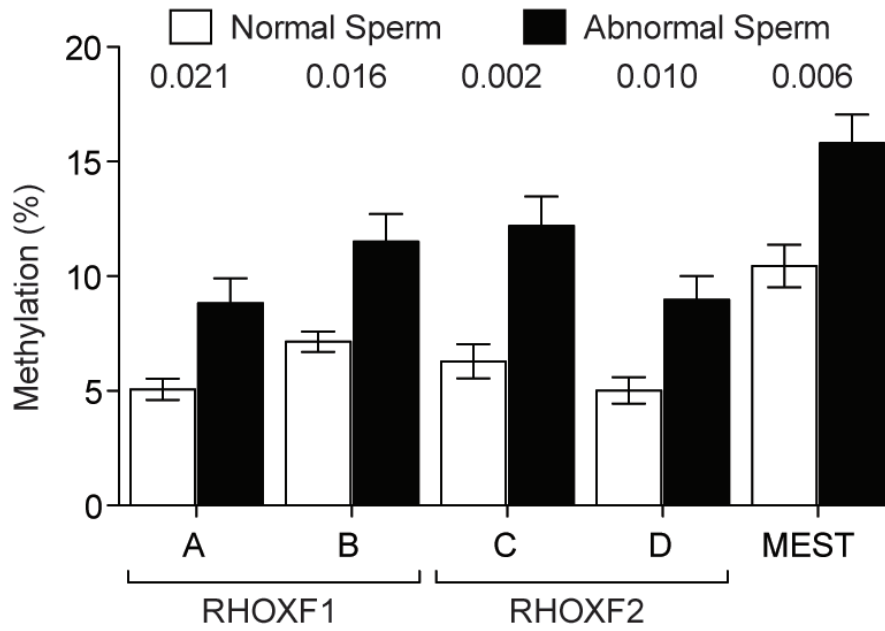

B

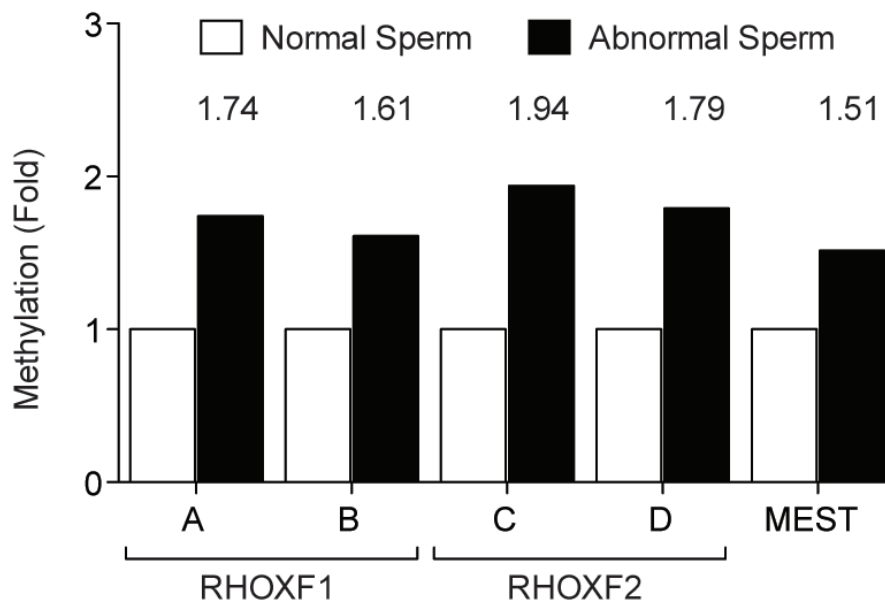

FIGURE S7

A

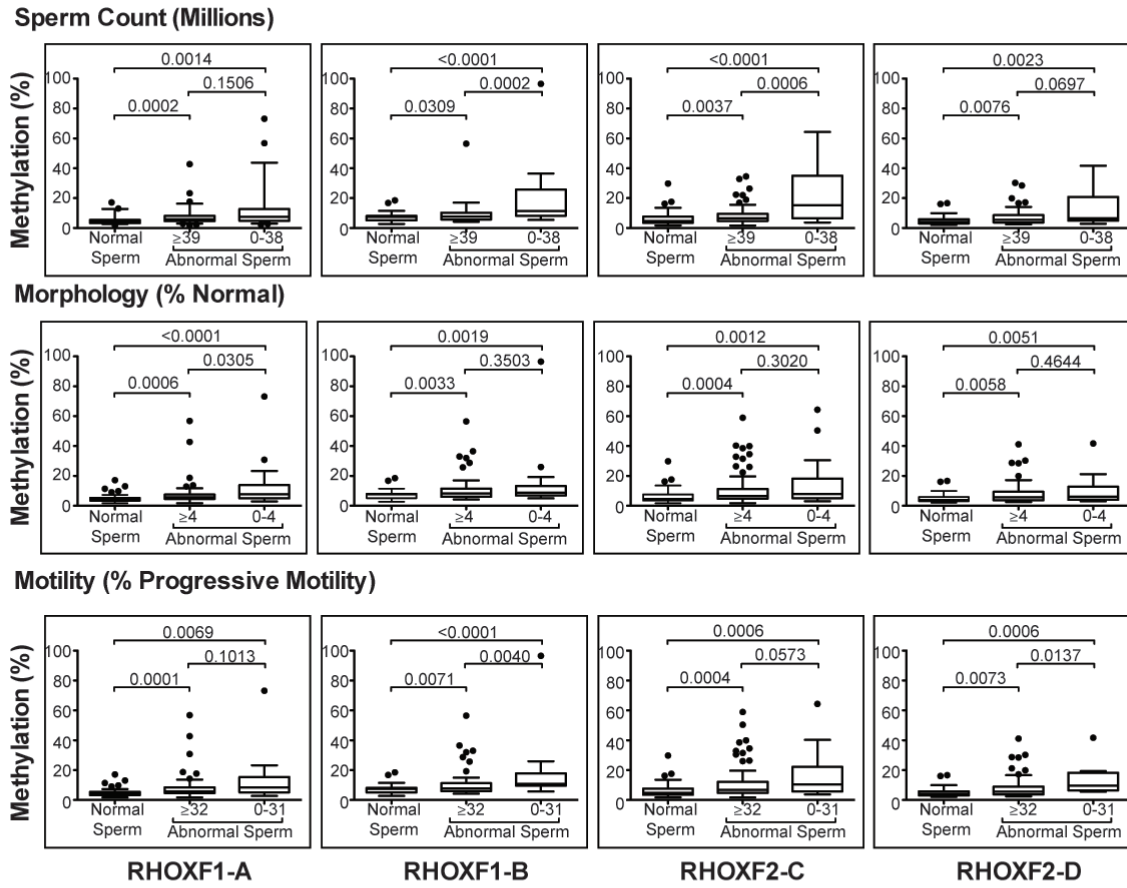

B

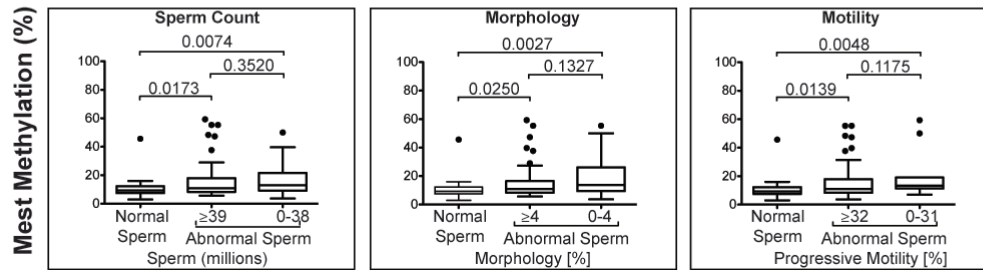

FIGURE S8

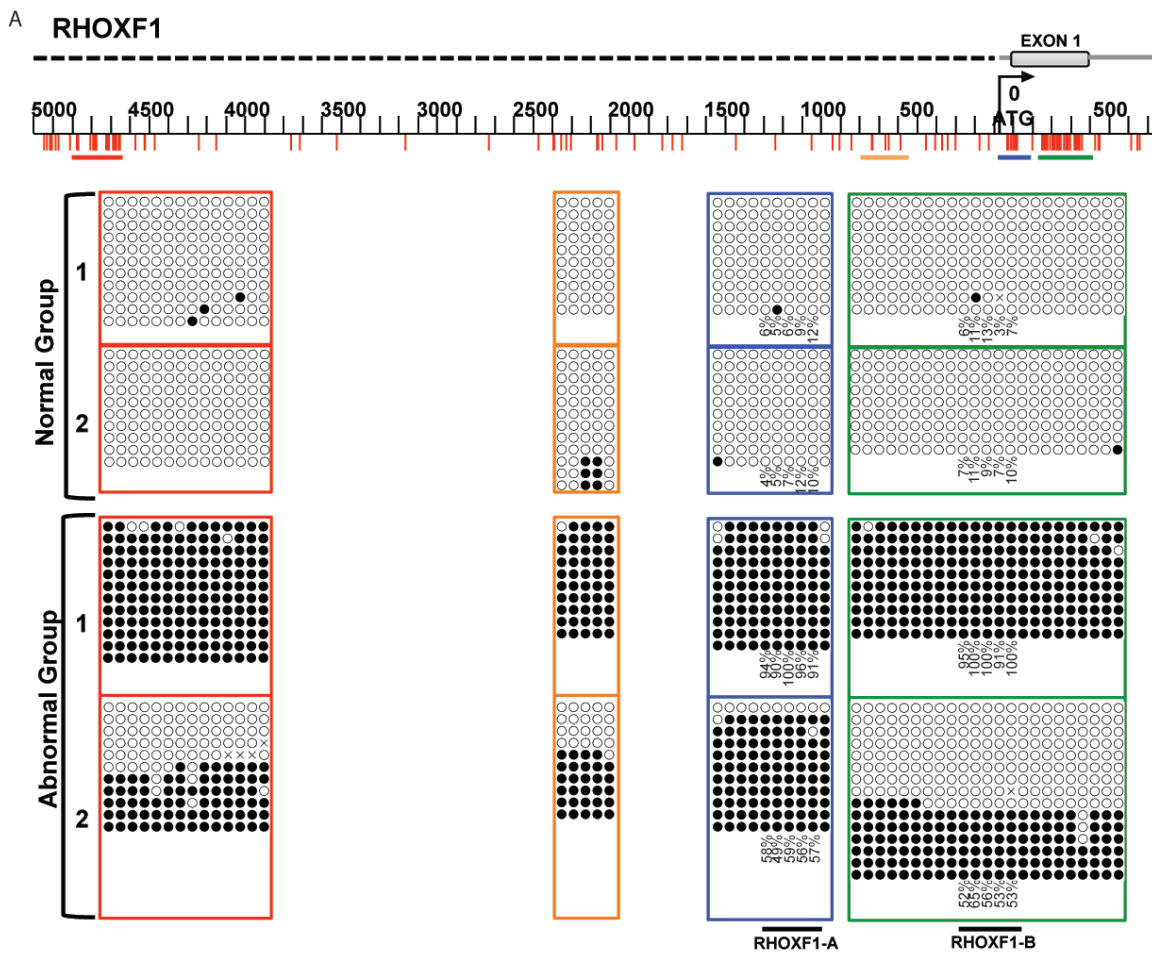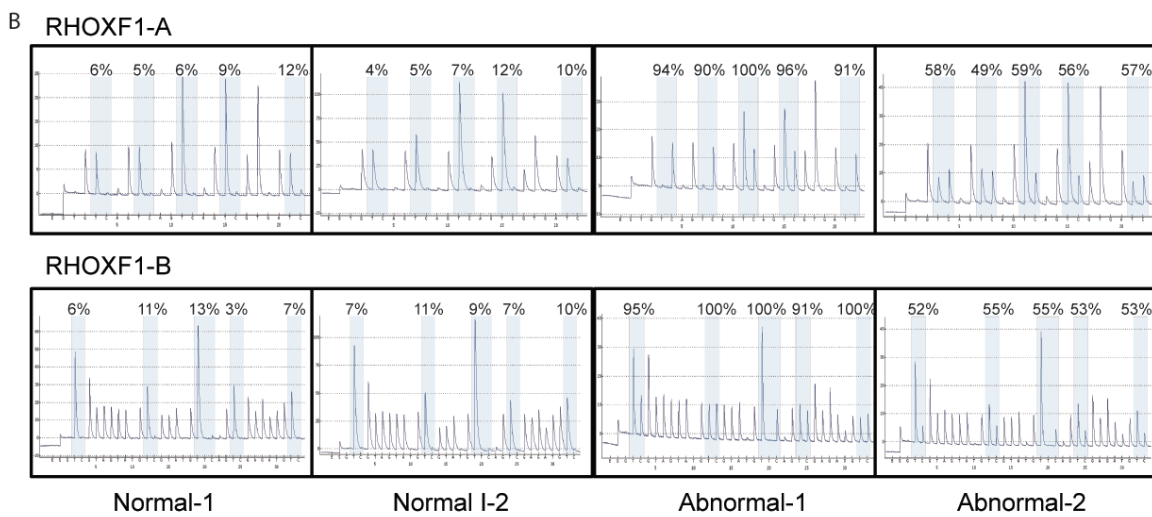

FIGURE S9

A **RHOXF2**

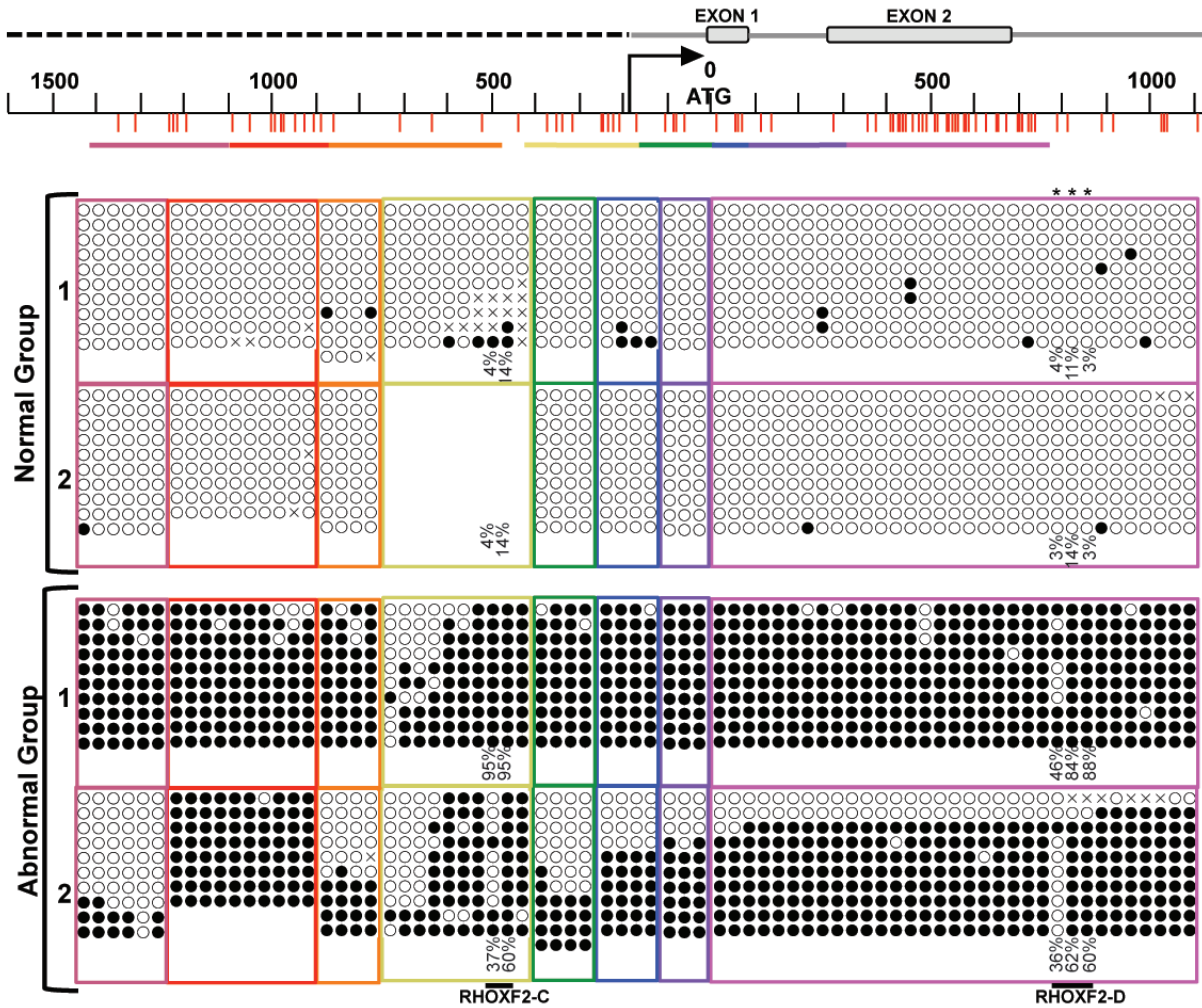

B **RHOXF2-C**

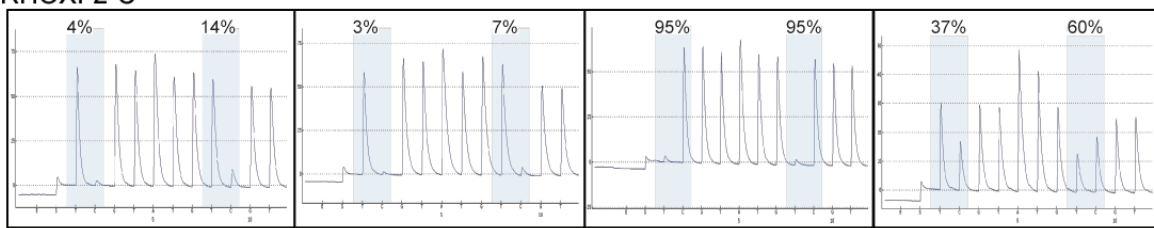

**RHOXF2-D**

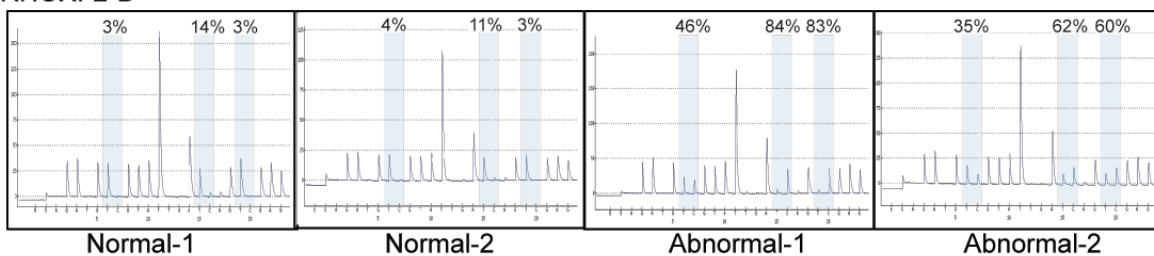

Figure S10

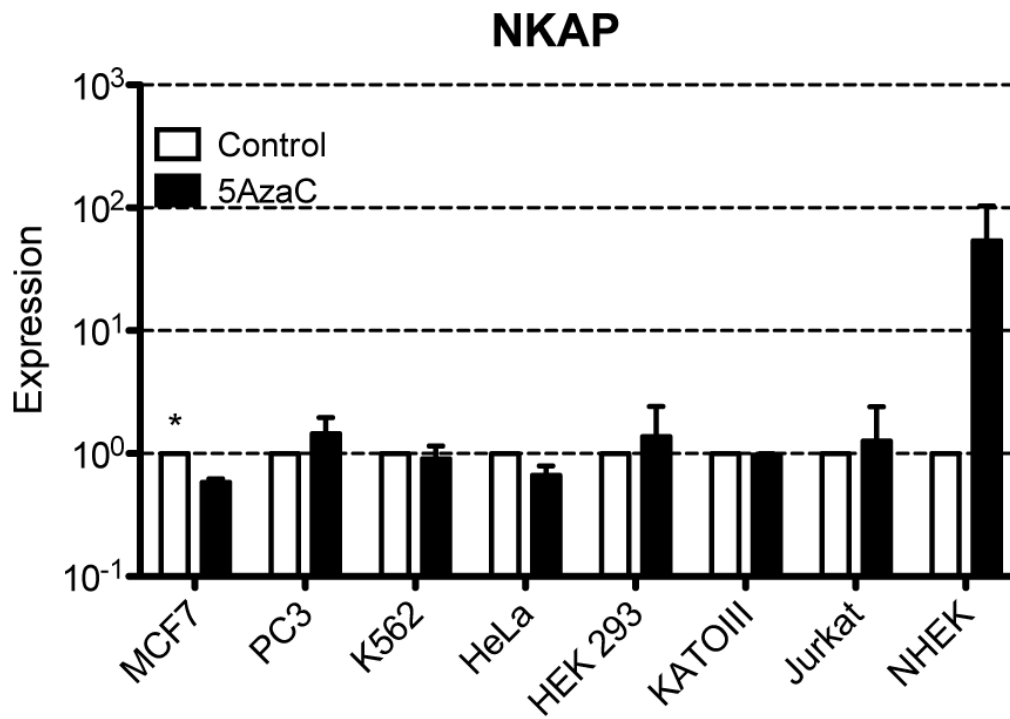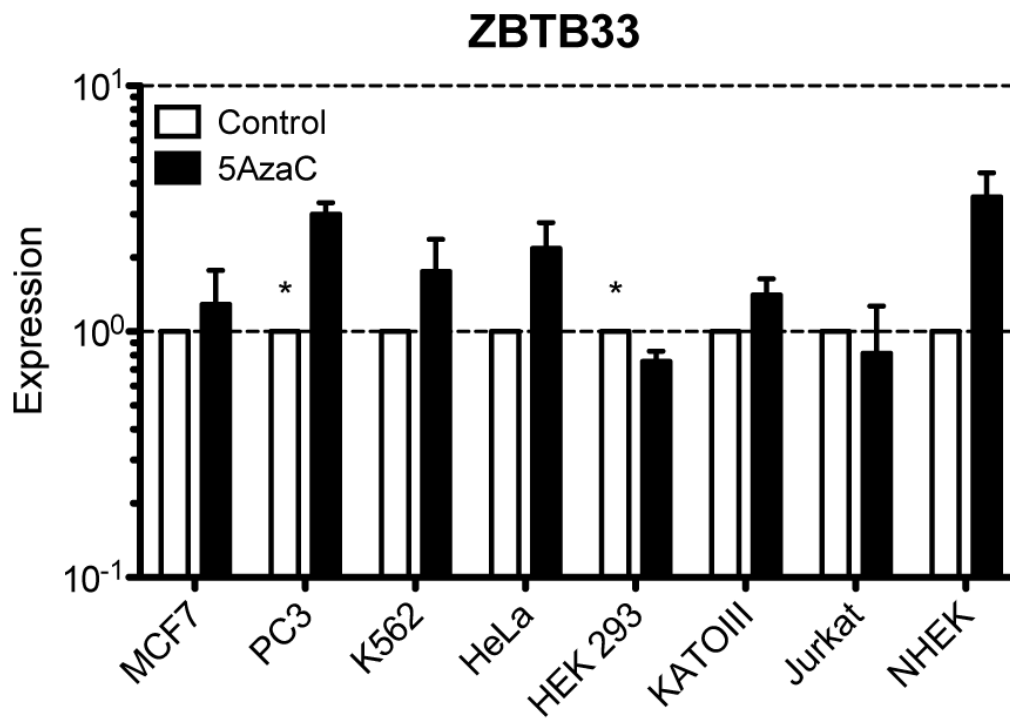

FIGURE S11

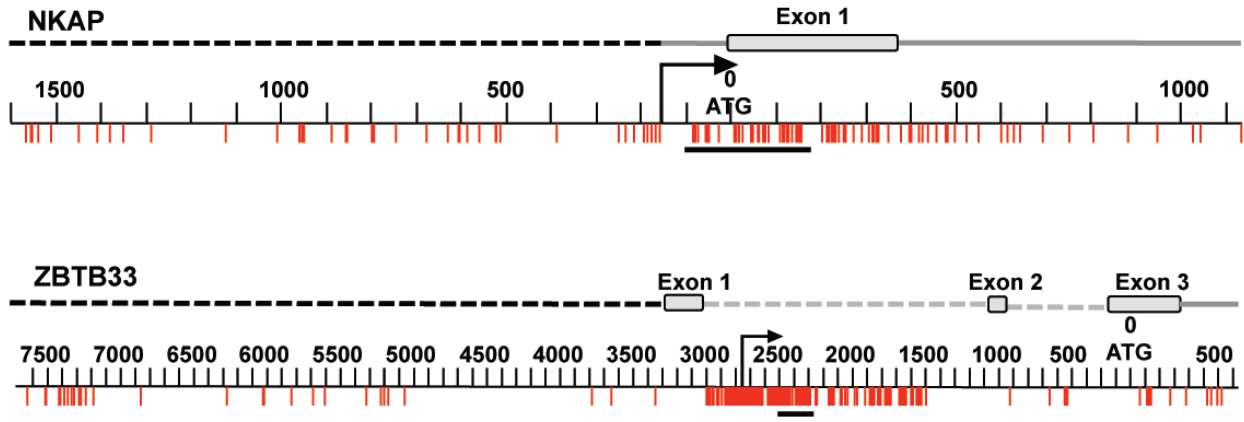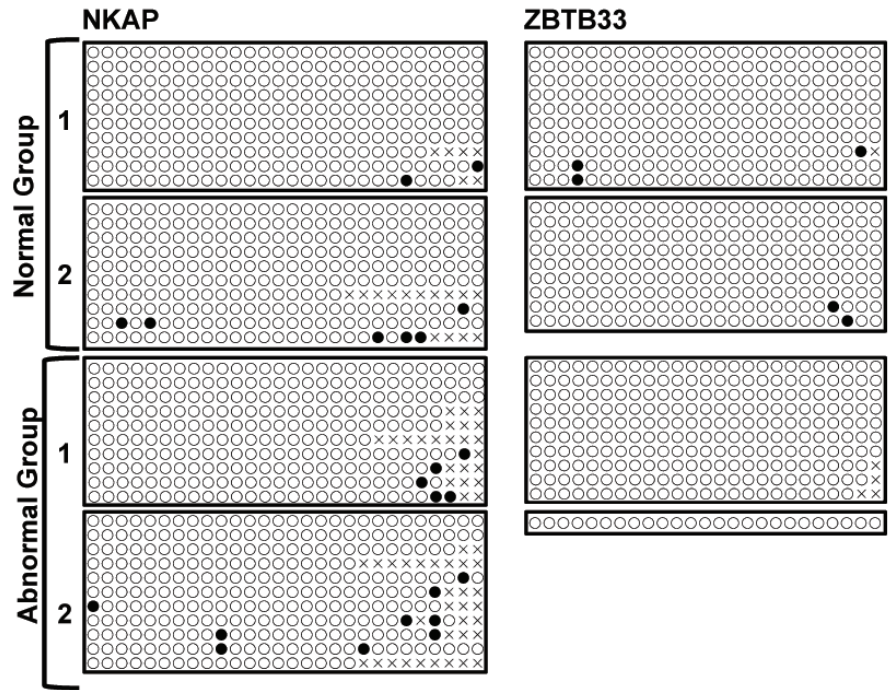

FIGURE S12

A

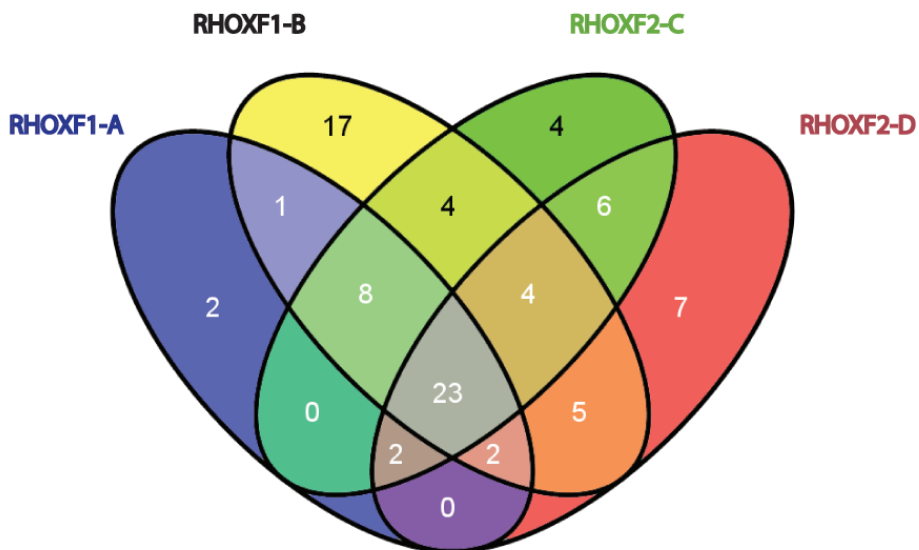

B

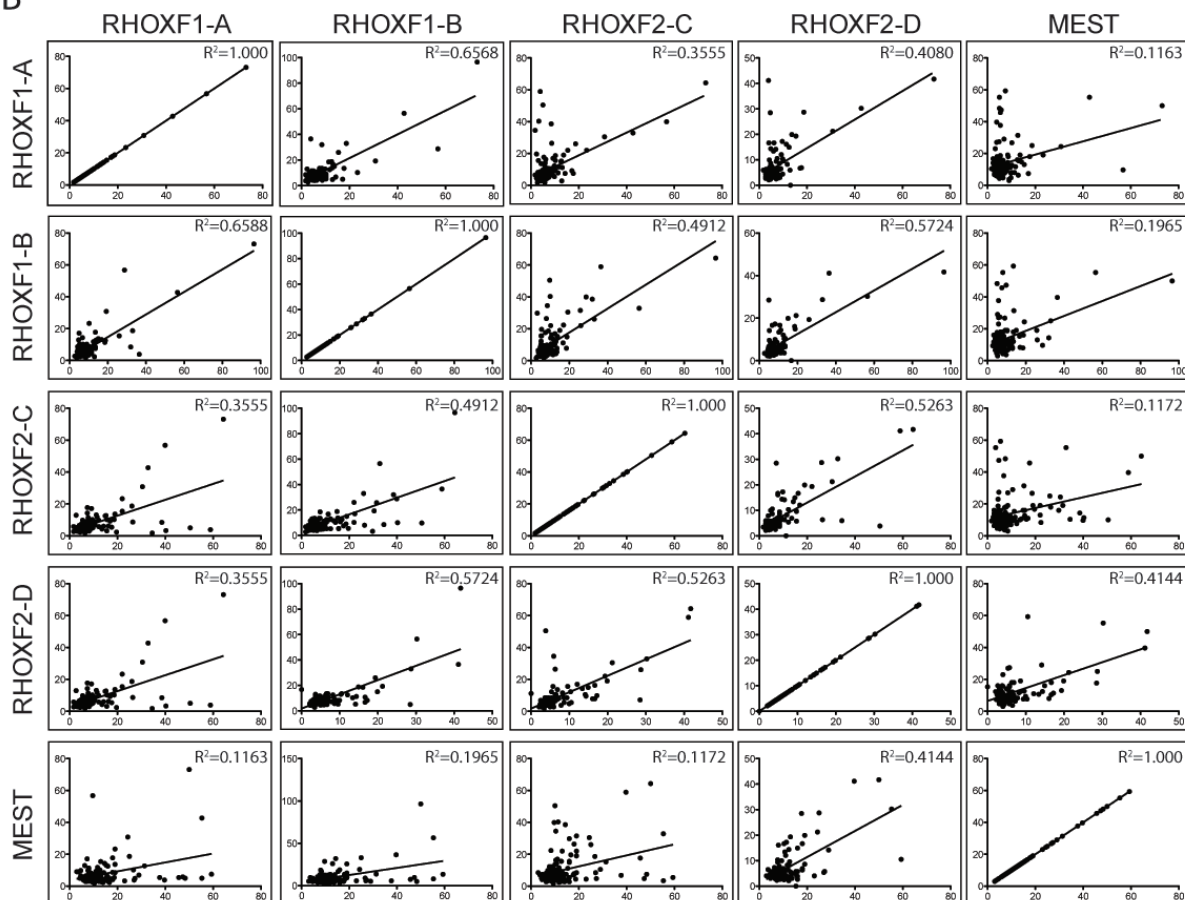

**Table S1. Bisulfite Sequencing Primers**

| Assay         | Gene | Location | Primer  | Sequence                       | Amplicon Size (bp) | Number of CpGs Covered |
|---------------|------|----------|---------|--------------------------------|--------------------|------------------------|
| <b>RHOXF1</b> |      |          |         |                                |                    |                        |
|               |      | -4910    | Forward | AAATTGAAAGTTGTATAAAGATAAT      | 279                | 14                     |
|               |      |          | Reverse | AATACTTAAACTTTTCTCAAAAAAC      |                    |                        |
|               |      | -892     | Forward | GAAGAGAGTATGGTAGTTTTGTTTTAGTG  | 281                | 5                      |
|               |      |          | Reverse | CAACATAAAACCCCAACTTACAAC       |                    |                        |
|               |      | +83      | Forward | ATATTAAGTATGAGAATAGGAATTAGTTT  | 199                | 10                     |
|               |      |          | Reverse | CCTTCTACCCTTAATACTACCCCAAC     |                    |                        |
|               |      | +130     | Forward | AAGGAGTTTTAGGTTTTATGGGTAAT     | 304                | 23                     |
|               |      |          | Reverse | CTCCTAAAACAAACCACTTACCTTATA    |                    |                        |
| <b>RHOXF2</b> |      |          |         |                                |                    |                        |
|               |      | -1412    | Forward | GTAGGAAAGAAGGGAAATTATTGTAG     | 248                | 6                      |
|               |      |          | Reverse | AAACTACTAACCCCAAATAATCCAC      |                    |                        |
|               |      | -1117    | Forward | TAATAATTATTTAGGTGTGTTGGTG      | 229                | 10                     |
|               |      |          | Reverse | AAAACTTAACCTTACCTTAAACAC       |                    |                        |
|               |      | -892     | Forward | GTGTTTAAGGTAAGGTTAAGTTTTT      | 458                | 4                      |
|               |      |          | Reverse | ATAAAAAAATTTTACACTAACCCCA      |                    |                        |
|               |      | -476     | Forward | GGAGATTTAGGAAGTATGGGGTTAGTG    | 286                | 10                     |
|               |      |          | Reverse | AAAACCTCCTCTCTACTTTTCTACTTC    |                    |                        |
|               |      | -171     | Forward | GAAGTAGAAAAGTAAGAGAGGAGGTTTT   | 181                | 4                      |
|               |      |          | Reverse | AAAACCTCATAACCTAAATAATATA      |                    |                        |
|               |      | -15      | Forward | TATATTATTTAGGGTATGGAGTTTT      | 103                | 4                      |
|               |      |          | Reverse | AATACTAACCTATAATTCTTTCTC       |                    |                        |
|               |      | +64      | Forward | AGAAAGAATTATAGGgtagtatttgatggg | 266                | 3                      |
|               |      |          | Reverse | CAAACATACATCCTCTTCCTCCTC       |                    |                        |
|               |      | +375     | Forward | GAGGAGGAAGAGGATGTATAGTTTG      | 484                | 33                     |
|               |      |          | Reverse | ACCAAACCCCAAATAAATTTTAATT      |                    |                        |
| <b>NKAP</b>   |      |          |         |                                |                    |                        |
|               |      | -119     | Forward | GTTTTTTTAGATTTGGGTTGTTT        | 300                | 28                     |
|               |      |          | Reverse | CCAATAATAAATAATCCATTCC         |                    |                        |
| <b>ZBTB33</b> |      |          |         |                                |                    |                        |
|               |      | -2427    | Forward | GTTTTTAATTAGGGAGGGG            | 261                | 25                     |
|               |      |          | Reverse | ATCTCTATAATAAATCCCAACC         |                    |                        |



**Table S2-Primers for qPCR, Sequencing and Cloning**

| Gene              | Assay            | Location* | Primer  | Sequence                         | Amplicon Size (bp) | Restriction Site |
|-------------------|------------------|-----------|---------|----------------------------------|--------------------|------------------|
| <b>RHOXF1</b>     |                  |           |         |                                  |                    |                  |
|                   | Primer Walking   | +35       | Reverse | TAGAACACGGTGTCTGGAC              |                    |                  |
|                   | Primer Walking   | -58       | Forward | AACCCCCACTCCAGCTGCA              | 93                 |                  |
|                   | Primer Walking   | -79       | Forward | CAGGAAGTAGCTCCACCCTCT            | 114                |                  |
|                   | Primer Walking   | -92       | Forward | CCAAGCATGAGAACAGGAACT            | 127                |                  |
|                   | Primer Walking   | -117      | Forward | CCACTCATTGCAACTGTAACCAATACC      | 152                |                  |
|                   | Primer Walking   | -126      | Forward | AAGCAAGTCCCCTCATTGC              | 164                |                  |
|                   | Primer Walking   | -153      | Forward | TCCATTCCCTCTCTTGCTTG             | 188                |                  |
|                   | Primer Walking   | -323      | Forward | CACAACCCTACCCTCACC               | 358                |                  |
|                   | Detection (qPCR) | +363      | Forward | TGGAGGAGCTGGAAAGTGT              | 75**               |                  |
|                   | Detection (qPCR) | +2996     | Reverse | ACCCGCACTTTGTCTTCAGT             |                    |                  |
|                   | Cloning          | 0         | Reverse | GGATCCGGCTGGAGCGCTGCG            |                    | BamHI            |
|                   | Cloning          | -592      | Forward | CCCAAGCTTAGTAGGGTGTAGTCAGCAAAGCT | 592                | HindIII          |
|                   | Cloning          | -1003     | Forward | GGATCCATGAGTACAGTTTCTCTGCATAGCC  | 1003               | BamHI            |
|                   | Cloning          | -2000     | Forward | GGATCCAGTGAGTCATGCTTCGGATCTGTG   | 2000               | BamHI            |
| <b>RHOXF2</b>     |                  |           |         |                                  |                    |                  |
|                   | Primer Walking   | +16       | Reverse | GGTCCGGAGGCTCCAT                 |                    |                  |
|                   | Primer Walking   | -34       | Forward | AGAAGTGCACAGCTCCATCC             | 50                 |                  |
|                   | Primer Walking   | -47       | Forward | GCTCAGAATCTGCAGAAGTGC            | 63                 |                  |
|                   | Primer Walking   | -95       | Forward | GCGGCGACTCACAGTTCTA              | 111                |                  |
|                   | Primer Walking   | -105      | Forward | AACGTTGCAGGCGGCGA                | 121                |                  |
|                   | Primer Walking   | -133      | Forward | CACTGTTGCTGAGTCTAGACACC          | 149                |                  |
|                   | Primer Walking   | -158      | Forward | AAGAGAGGAGGTCTCTAAGTGG           | 174                |                  |
|                   | Primer Walking   | -178      | Forward | ATAGCGGGAAGCAGAAAAGC             | 194                |                  |
|                   | Primer Walking   | -194      | Forward | GCCCAACCCACAGCAAATAG             | 210                |                  |
|                   | Primer Walking   | -218      | Forward | CCTGACGCATGCGCACCT               | 234                |                  |
|                   | Primer Walking   | -239      | Forward | TCATCCGGGCAAGGCCAA               | 255                |                  |
|                   | Primer Walking   | -260      | Forward | ACCACCAACGCGTGCTCT               | 276                |                  |
|                   | Primer Walking   | -282      | Forward | CCACTTACCCTCCCCC                 | 298                |                  |
|                   | Primer Walking   | -302      | Forward | CTCCCCACACCCTACTACA              | 318                |                  |
|                   | Primer Walking   | -319      | Forward | CCACGCCCTACTCCCC                 | 335                |                  |
|                   | Detection (qPCR) | +1636     | Forward | GGCAAGAAGCATGAATGTGA             | 103**              |                  |
|                   | Detection (qPCR) | +4745     | Reverse | TGTCTCTCCATTTGGCTCT              |                    |                  |
|                   | Cloning          | 0         | Reverse | CCATGGACCCTGAGTGGTGTGGATG        |                    | NcoI             |
|                   | Cloning          | -983      | Forward | GGAAGATCTGCAAGGCCAAGCCCCTG       | 983                | BgIII            |
|                   | Cloning          | -793      | Forward | GGAAGATCTAGTGGATACACTGTTACTGAATC | 793                | BgIII            |
|                   | Cloning          | -711      | Forward | GGAAGATCTCAGAGCGAGACTGTCTCA      | 711                | BgIII            |
|                   | Cloning          | -606      | Forward | GGAAGATCTCCCAAGCTCCTGCTCCTG      | 606                | BgIII            |
|                   | Cloning          | -493      | Forward | GGAAGATCTCCTCGCACTTTGATGTGG      | 493                | BgIII            |
|                   | Cloning          | -393      | Forward | GGAAGATCTCCCAAGTTCCACACTCACG     | 393                | BgIII            |
|                   | Cloning          | -293      | Forward | GGAAGATCTACCCTACTACCACTTACC      | 293                | BgIII            |
|                   | Cloning          | -193      | Forward | GGAAGATCTCCCAACCCACAGCAAATAG     | 193                | BgIII            |
| <b>Sequencing</b> |                  |           |         |                                  |                    |                  |
|                   | pCpGL            |           | Forward | CCACTGATTTTTGTTTATGTGAGCAAAC     |                    |                  |
|                   | pCpGL            |           | Reverse | TAGAATGGGGCAGGGCCTTT             |                    |                  |
| <b>Detection</b>  |                  |           |         |                                  |                    |                  |
|                   | NKAP             |           | Forward | GCATCATTTGAATGCTCAGG             |                    |                  |
|                   | NKAP             |           | Reverse | TGCAAGGGCTCTTCTCAT               |                    |                  |
|                   | ZBTB33           |           | Forward | TTCTTCTGTTGGGGGACTC              |                    |                  |
|                   | ZBTB33           |           | Reverse | GTCCCTTCCCCTCATCTCTC             |                    |                  |

\*Locations are depicted relative to the ATG; \*\*Based on spliced mRNA

**Table S3. Pyrosequencing Primers**

| Assay                                                                      | Gene | Location | Primer     | Sequence                       | Amplicon Size (bp) | Number of CpGs Covered |
|----------------------------------------------------------------------------|------|----------|------------|--------------------------------|--------------------|------------------------|
| <b>RHOXF1</b>                                                              |      |          |            |                                |                    |                        |
|                                                                            |      | Region A | Forward    | ATATTAAGTATGAGAATAGGAATTAGTTT  | 199                | 5                      |
|                                                                            |      |          | Reverse*   | CCTTCTACCCTTAATACTACCCCAAC     |                    |                        |
|                                                                            |      |          | Sequencing | AGGGGAGTAGAGTTTTAGTTATG        |                    |                        |
|                                                                            |      | Region B | Forward    | AAGGAGTTTTAGGTTTTATGGGTAAT     | 304                | 5                      |
|                                                                            |      |          | Reverse*   | CTCCTAAAACAAACCACTTACCTTATA    |                    |                        |
|                                                                            |      |          | Sequencing | GGTGAAATTAGGAGT                |                    |                        |
| <b>RHOXF2</b>                                                              |      |          |            |                                |                    |                        |
|                                                                            |      | Region A | Forward    | TTTTTTTTTATTAGGGTAAGGTTAAGT    | 101                | 3                      |
|                                                                            |      |          | Reverse*   | AACCTCCTCTCTACTTTTTCT          |                    |                        |
|                                                                            |      |          | Sequencing | GGGTAAGGTTAAGTTTTTGA           |                    |                        |
|                                                                            |      | Region B | Forward    | GGGGGTTGGAGTTTGGTAA            | 137                | 3                      |
|                                                                            |      |          | Reverse*   | CCAACCAAAACAATAAACTTACC        |                    |                        |
|                                                                            |      |          | Sequencing | TGTAGTTGTAGGAGTTG              |                    |                        |
| <b>MEST</b>                                                                |      |          |            |                                |                    |                        |
|                                                                            |      |          | Forward    | TGTGGTTGGAGTTTTGGGATTA         | 78                 | 3                      |
|                                                                            |      |          | Reverse*   | CAAAAACAACCCCAACT              |                    |                        |
|                                                                            |      |          | Sequencing | GGTTTTGGGATTAGGG               |                    |                        |
| <b>NKAP</b>                                                                |      |          |            |                                |                    |                        |
|                                                                            |      |          | Forward    | GGTAGGTTTAGGGAATTAAGGTAATAGATA | 275                | 5                      |
|                                                                            |      |          | Reverse*   | CCACCAACTAATAAATAAATCCATTC     |                    |                        |
|                                                                            |      |          | Sequencing | AGAGTTAGAAGTTTAGTAAATTTGT      |                    |                        |
| <b>ZBTB33</b>                                                              |      |          |            |                                |                    |                        |
|                                                                            |      |          | Forward    | GAGTGAGGTTTTTTTTTGTGGGGGATT    | 117                | 4                      |
|                                                                            |      |          | Reverse*   | CTCCTTCCCCCTCCCTAATTAA         |                    |                        |
|                                                                            |      |          | Sequencing | GTTGGGGGATTTTAG                |                    |                        |
| *Indicates biotinylated primer; Locations are depicted relative to the ATG |      |          |            |                                |                    |                        |
